# Supplementary material
Source: MDPI journal article supplement (https://www.mdpi.com/1420-3049/26/7/1833)

# checkCIF/PLATON report

Structure factors have been supplied for datablock(s) averievite-pcscl

THIS REPORT IS FOR GUIDANCE ONLY. IF USED AS PART OF A REVIEW PROCEDURE FOR PUBLICATION, IT SHOULD NOT REPLACE THE EXPERTISE OF AN EXPERIENCED CRYSTALLOGRAPHIC REFEREE.

No syntax errors found.      CIF dictionary      Interpreting this report

## Datablock: averievite-pcscl

---

Bond precision:    P- O = 0.0030 A                      Wavelength=0.71073

Cell:                      a=6.1842(1)              b=6.1842(1)              c=8.2333(2)  
                                alpha=90              beta=90              gamma=120  
Temperature:              296 K

|                | Calculated                      | Reported                    |
|----------------|---------------------------------|-----------------------------|
| Volume         | 272.692(11)                     | 272.691(11)                 |
| Space group    | P -3 m 1                        | P -3 m 1                    |
| Hall group     | -P 3 2"                         | -P 3 2"                     |
| Moiety formula | Cu5 O10 P2, Cs0.40, Cl, 0.6(Cs) | 2(Cl0.5 Cs0.51 Cu2.5 O5 P1) |
| Sum formula    | Cl Cs Cu5 O10 P2                | Cl Cs Cu5 O10 P2            |
| Mr             | 708.05                          | 708.00                      |
| Dx,g cm-3      | 4.312                           | 4.311                       |
| Z              | 1                               | 1                           |
| Mu (mm-1)      | 13.460                          | 13.460                      |
| F000           | 327.0                           | 327.0                       |
| F000'          | 328.72                          |                             |
| h,k,lmax       | 8,8,10                          | 8,8,10                      |
| Nref           | 270                             | 269                         |
| Tmin,Tmax      | 0.217,0.668                     | 0.701,1.000                 |
| Tmin'          | 0.182                           |                             |

Correction method= # Reported T Limits: Tmin=0.701 Tmax=1.000  
AbsCorr = MULTI-SCAN

Data completeness= 0.996                      Theta(max)= 27.499

R(reflections)= 0.0153( 267)              wR2(reflections)= 0.0365( 269)

S = 1.168                      Npar= 33

---

The following ALERTS were generated. Each ALERT has the format

**test-name\_ALERT\_alert-type\_alert-level.**

Click on the hyperlinks for more details of the test.

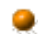

### Alert level B

PLAT250\_ALERT\_2\_B Large U3/U1 Ratio for Average U(i,j) Tensor ....

6.5 Note

**Author Response: The large U3/U1 ratio is a characteristic of the particular structure.**

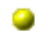

### Alert level C

PLAT088\_ALERT\_3\_C Poor Data / Parameter Ratio ..... 8.15 Note  
PLAT213\_ALERT\_2\_C Atom Cu1 has ADP max/min Ratio ..... 3.2 oblate  
PLAT213\_ALERT\_2\_C Atom Cu2 has ADP max/min Ratio ..... 3.2 prolat  
PLAT743\_ALERT\_1\_C Torsion Calc -120.01(8), Rep -120.00 ..... Missing s.u.  
O2 -CU1 -O3 -CU2 9.666 1.555 1.555 2.665 # 121 Check  
PLAT753\_ALERT\_4\_C Torsion Calc -120.00, Rep -120.00 ..... Senseless s.u.  
CU2 -CU1 -O3 -CU2 2.665 1.555 1.555 1.555 # 109 Check  
PLAT753\_ALERT\_4\_C Torsion Calc 120.00, Rep 120.00 ..... Senseless s.u.  
CU2 -CU1 -O3 -CU2 3.565 1.555 1.555 1.555 # 110 Check  
PLAT753\_ALERT\_4\_C Torsion Calc -120.00, Rep -120.00 ..... Senseless s.u.  
CU2 -CU1 -O3 -CU2 3.565 1.555 1.555 2.665 # 111 Check  
PLAT753\_ALERT\_4\_C Torsion Calc 120.00, Rep 120.00 ..... Senseless s.u.  
CU2 -CU1 -O3 -CU2 2.665 1.555 1.555 3.565 # 112 Check  
PLAT927\_ALERT\_1\_C Reported and Calculated wR2 Differ by ..... -0.0021 Check  
PLAT973\_ALERT\_2\_C Check Calcd Positive Resid. Density on Cs1A 1.14 eA-3

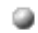

### Alert level G

FORMU01\_ALERT\_1\_G There is a discrepancy between the atom counts in the  
\_chemical\_formula\_sum and \_chemical\_formula\_moiety. This is  
usually due to the moiety formula being in the wrong format.  
Atom count from \_chemical\_formula\_sum: Cl1 Cs1 Cu5 O10 P2  
Atom count from \_chemical\_formula\_moiety:Cl1 Cs1.02 Cu5 O10 P2  
PLAT004\_ALERT\_5\_G Polymeric Structure Found with Maximum Dimension 3 Info  
PLAT042\_ALERT\_1\_G Calc. and Reported MoietyFormula Strings Differ Please Check  
PLAT302\_ALERT\_4\_G Anion/Solvent/Minor-Residue Disorder (Resd 2 ) 100% Note  
PLAT302\_ALERT\_4\_G Anion/Solvent/Minor-Residue Disorder (Resd 4 ) 100% Note  
PLAT794\_ALERT\_5\_G Tentative Bond Valency for Cu1 (II) . 2.09 Info  
PLAT883\_ALERT\_1\_G No Info/Value for \_atom\_sites\_solution\_primary . Please Do !  
PLAT910\_ALERT\_3\_G Missing # of FCF Reflection(s) Below Theta(Min). 1 Note  
PLAT961\_ALERT\_5\_G Dataset Contains no Negative Intensities ..... Please Check

0 **ALERT level A** = Most likely a serious problem - resolve or explain

1 **ALERT level B** = A potentially serious problem, consider carefully

10 **ALERT level C** = Check. Ensure it is not caused by an omission or oversight

9 **ALERT level G** = General information/check it is not something unexpected

5 ALERT type 1 CIF construction/syntax error, inconsistent or missing data

4 ALERT type 2 Indicator that the structure model may be wrong or deficient

2 ALERT type 3 Indicator that the structure quality may be low

6 ALERT type 4 Improvement, methodology, query or suggestion

3 ALERT type 5 Informative message, check

It is advisable to attempt to resolve as many as possible of the alerts in all categories. Often the minor alerts point to easily fixed oversights, errors and omissions in your CIF or refinement strategy, so attention to these fine details can be worthwhile. In order to resolve some of the more serious problems it may be necessary to carry out additional measurements or structure refinements. However, the purpose of your study may justify the reported deviations and the more serious of these should normally be commented upon in the discussion or experimental section of a paper or in the "special\_details" fields of the CIF. checkCIF was carefully designed to identify outliers and unusual parameters, but every test has its limitations and alerts that are not important in a particular case may appear. Conversely, the absence of alerts does not guarantee there are no aspects of the results needing attention. It is up to the individual to critically assess their own results and, if necessary, seek expert advice.

### **Publication of your CIF in IUCr journals**

A basic structural check has been run on your CIF. These basic checks will be run on all CIFs submitted for publication in IUCr journals (*Acta Crystallographica*, *Journal of Applied Crystallography*, *Journal of Synchrotron Radiation*); however, if you intend to submit to *Acta Crystallographica Section C* or *E* or *IUCrData*, you should make sure that full publication checks are run on the final version of your CIF prior to submission.

### **Publication of your CIF in other journals**

Please refer to the *Notes for Authors* of the relevant journal for any special instructions relating to CIF submission.

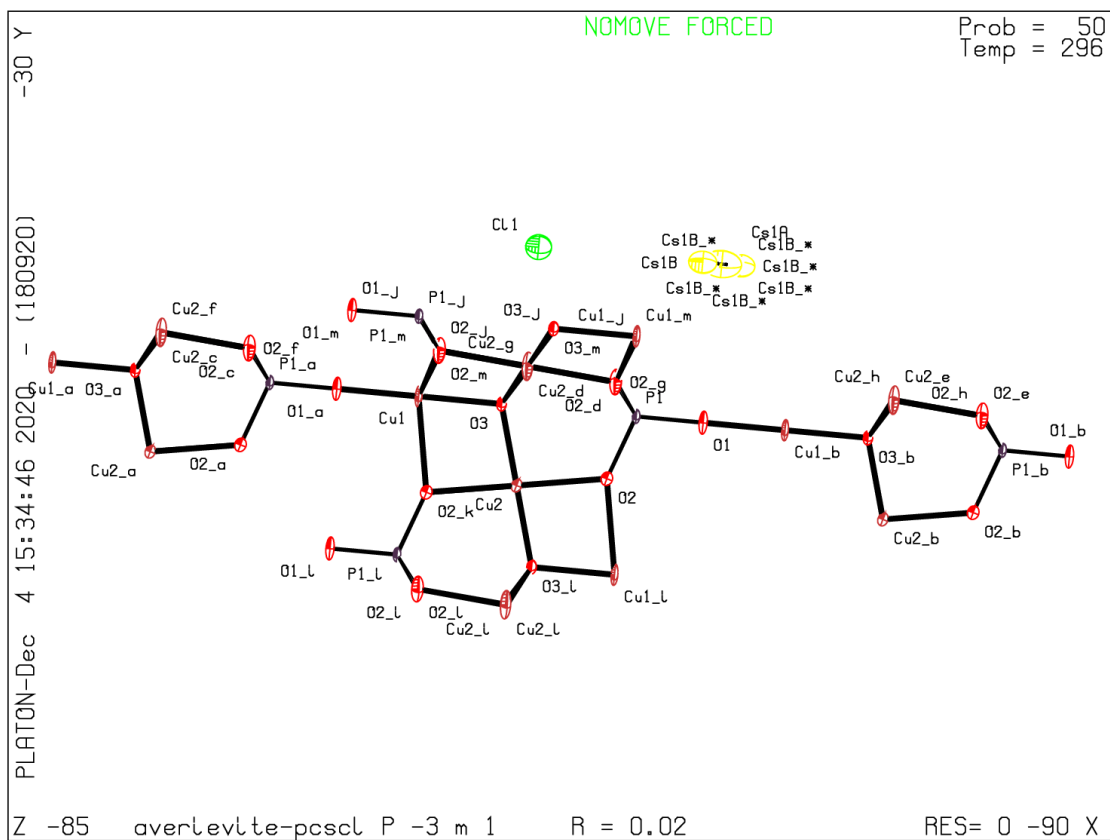

Supplement: s1 [file s1]
