# Supplementary material for: Expanding the Averievite Family, (MX)Cu5O2(T5+O4)2 (T5+ = P, V; M = K, Rb, Cs, Cu; X = Cl, Br): Synthesis and Single-Crystal X-ray Diffraction Study
Source: MDPI journal article supplement (doi:10.3390/molecules26071833), 2021-03-24

# checkCIF/PLATON report

Structure factors have been supplied for datablock(s) shelx

THIS REPORT IS FOR GUIDANCE ONLY. IF USED AS PART OF A REVIEW PROCEDURE FOR PUBLICATION, IT SHOULD NOT REPLACE THE EXPERTISE OF AN EXPERIENCED CRYSTALLOGRAPHIC REFEREE.

No syntax errors found.      CIF dictionary      Interpreting this report

## Datablock: shelx

---

Bond precision:    V- O = 0.0033 A                      Wavelength=0.71073

Cell:                      a=6.406(4)              b=6.406(4)              c=8.403(5)  
                            alpha=90              beta=90              gamma=120  
Temperature:              296 K

|                | Calculated                                                                  | Reported                                                             |
|----------------|-----------------------------------------------------------------------------|----------------------------------------------------------------------|
| Volume         | 298.6(4)                                                                    | 298.6(4)                                                             |
| Space group    | P -3 m 1                                                                    | P -3 m 1                                                             |
| Hall group     | -P 3 2"                                                                     | -P 3 2"                                                              |
| Moiety formula | Cu <sub>4.98</sub> O <sub>10</sub> V <sub>2</sub> , 2.064(Cl),<br>1.741(Cu) | ?                                                                    |
| Sum formula    | Cl <sub>2.06</sub> Cu <sub>6.72</sub> O <sub>10</sub> V <sub>2</sub>        | Cl <sub>2.07</sub> Cu <sub>6.74</sub> O <sub>10</sub> V <sub>2</sub> |
| Mr             | 762.17                                                                      | 763.52                                                               |
| Dx,g cm-3      | 4.239                                                                       | 4.246                                                                |
| Z              | 1                                                                           | 1                                                                    |
| Mu (mm-1)      | 13.710                                                                      | 13.743                                                               |
| F000           | 356.0                                                                       | 357.0                                                                |
| F000'          | 359.19                                                                      |                                                                      |
| h,k,lmax       | 11,11,14                                                                    | 10,10,14                                                             |
| Nref           | 643                                                                         | 643                                                                  |
| Tmin,Tmax      |                                                                             |                                                                      |
| Tmin'          |                                                                             |                                                                      |

Correction method= Not given

Data completeness= 1.000                      Theta(max)= 37.666

R(reflections)= 0.0326( 578)                      wR2(reflections)= 0.0815( 643)

S = 1.108                      Npar= 57

---

The following ALERTS were generated. Each ALERT has the format

**test-name\_ALERT\_alert-type\_alert-level.**

Click on the hyperlinks for more details of the test.

---

### Alert level A

PLAT974\_ALERT\_2\_A Check Calcd Negative Resid. Density on Cu4 -4.58 eA-3

---

### Alert level B

DIFMN02\_ALERT\_2\_B The minimum difference density is < -0.1\*ZMAX\*1.00

\_refine\_diff\_density\_min given = -4.600

Test value = -2.900

PLAT098\_ALERT\_2\_B Large Reported Min. (Negative) Residual Density -4.60 eA-3

PLAT250\_ALERT\_2\_B Large U3/U1 Ratio for Average U(i,j) Tensor .... 4.7 Note

---

### Alert level C

DIFMN03\_ALERT\_1\_C The minimum difference density is < -0.1\*ZMAX\*0.75

The relevant atom site should be identified.

DIFMX02\_ALERT\_1\_C The maximum difference density is > 0.1\*ZMAX\*0.75

The relevant atom site should be identified.

|                   |                                                  |                             |               |
|-------------------|--------------------------------------------------|-----------------------------|---------------|
| PLAT041_ALERT_1_C | Calc. and Reported SumFormula                    | Strings Differ              | Please Check  |
| PLAT043_ALERT_1_C | Calculated and Reported Mol. Weight              | Differ by ..                | 1.35 Check    |
| PLAT052_ALERT_1_C | Info on Absorption Correction Method             | Not Given                   | Please Do !   |
| PLAT053_ALERT_1_C | Minimum Crystal Dimension Missing (or Error)     | ...                         | Please Check  |
| PLAT054_ALERT_1_C | Medium Crystal Dimension Missing (or Error)      | ...                         | Please Check  |
| PLAT055_ALERT_1_C | Maximum Crystal Dimension Missing (or Error)     | ...                         | Please Check  |
| PLAT068_ALERT_1_C | Reported F000 Differs from Calcd (or Missing)... |                             | Please Check  |
| PLAT077_ALERT_4_C | Unitcell Contains Non-integer Number of Atoms .. |                             | Please Check  |
| PLAT097_ALERT_2_C | Large Reported Max. (Positive) Residual Density  | 2.31 eA-3                   |               |
| PLAT213_ALERT_2_C | Atom Cu2                                         | has ADP max/min Ratio ..... | 3.1 oblate    |
| PLAT213_ALERT_2_C | Atom O3                                          | has ADP max/min Ratio ..... | 3.1 prolat    |
| PLAT220_ALERT_2_C | NonSolvent Resd 1 O                              | Ueq(max)/Ueq(min) Range     | 3.1 Ratio     |
| PLAT260_ALERT_2_C | Large Average Ueq of Residue Including           | Cu4                         | 0.134 Check   |
| PLAT313_ALERT_2_C | Oxygen with Three Covalent Bonds (rare)          | .....                       | O2 Check      |
| PLAT927_ALERT_1_C | Reported and Calculated wR2                      | Differ by .....             | -0.0016 Check |
| PLAT971_ALERT_2_C | Check Calcd Resid. Dens.                         | 0.43A From Cu4              | 2.04 eA-3     |
| PLAT973_ALERT_2_C | Check Calcd Positive Resid. Density on           | Cu2                         | 1.43 eA-3     |
| PLAT976_ALERT_2_C | Check Calcd Resid. Dens.                         | 0.88A From O1               | -0.47 eA-3    |

---

### Alert level G

FORMU01\_ALERT\_2\_G There is a discrepancy between the atom counts in the  
\_chemical\_formula\_sum and the formula from the \_atom\_site\* data.

Atom count from \_chemical\_formula\_sum: Cl2.07 Cu6.74 O10 V2

Atom count from the \_atom\_site data: Cl2.064 Cu6.721 O10 V2

|                   |                                                  |           |             |
|-------------------|--------------------------------------------------|-----------|-------------|
| PLAT004_ALERT_5_G | Polymeric Structure Found with Maximum Dimension | 3         | Info        |
| PLAT301_ALERT_3_G | Main Residue Disorder .....                      | (Resd 1 ) | 28% Note    |
| PLAT302_ALERT_4_G | Anion/Solvent/Minor-Residue Disorder (Resd 2 )   |           | 100% Note   |
| PLAT302_ALERT_4_G | Anion/Solvent/Minor-Residue Disorder (Resd 3 )   |           | 100% Note   |
| PLAT302_ALERT_4_G | Anion/Solvent/Minor-Residue Disorder (Resd 4 )   |           | 100% Note   |
| PLAT302_ALERT_4_G | Anion/Solvent/Minor-Residue Disorder (Resd 5 )   |           | 100% Note   |
| PLAT302_ALERT_4_G | Anion/Solvent/Minor-Residue Disorder (Resd 6 )   |           | 100% Note   |
| PLAT811_ALERT_5_G | No ADDSYM Analysis: Too Many Excluded Atoms .... |           | ! Info      |
| PLAT883_ALERT_1_G | No Info/Value for _atom_sites_solution_primary . |           | Please Do ! |

---

1 ALERT level A = Most likely a serious problem - resolve or explain

3 ALERT level B = A potentially serious problem, consider carefully

20 ALERT level C = Check. Ensure it is not caused by an omission or oversight

10 ALERT level G = General information/check it is not something unexpected

11 ALERT type 1 CIF construction/syntax error, inconsistent or missing data

14 ALERT type 2 Indicator that the structure model may be wrong or deficient  
1 ALERT type 3 Indicator that the structure quality may be low  
6 ALERT type 4 Improvement, methodology, query or suggestion  
2 ALERT type 5 Informative message, check

---

It is advisable to attempt to resolve as many as possible of the alerts in all categories. Often the minor alerts point to easily fixed oversights, errors and omissions in your CIF or refinement strategy, so attention to these fine details can be worthwhile. In order to resolve some of the more serious problems it may be necessary to carry out additional measurements or structure refinements. However, the purpose of your study may justify the reported deviations and the more serious of these should normally be commented upon in the discussion or experimental section of a paper or in the "special\_details" fields of the CIF. checkCIF was carefully designed to identify outliers and unusual parameters, but every test has its limitations and alerts that are not important in a particular case may appear. Conversely, the absence of alerts does not guarantee there are no aspects of the results needing attention. It is up to the individual to critically assess their own results and, if necessary, seek expert advice.

### **Publication of your CIF in IUCr journals**

A basic structural check has been run on your CIF. These basic checks will be run on all CIFs submitted for publication in IUCr journals (*Acta Crystallographica*, *Journal of Applied Crystallography*, *Journal of Synchrotron Radiation*); however, if you intend to submit to *Acta Crystallographica Section C* or *E* or *IUCrData*, you should make sure that full publication checks are run on the final version of your CIF prior to submission.

### **Publication of your CIF in other journals**

Please refer to the *Notes for Authors* of the relevant journal for any special instructions relating to CIF submission.

---

**PLATON version of 05/12/2020; check.def file version of 05/12/2020**

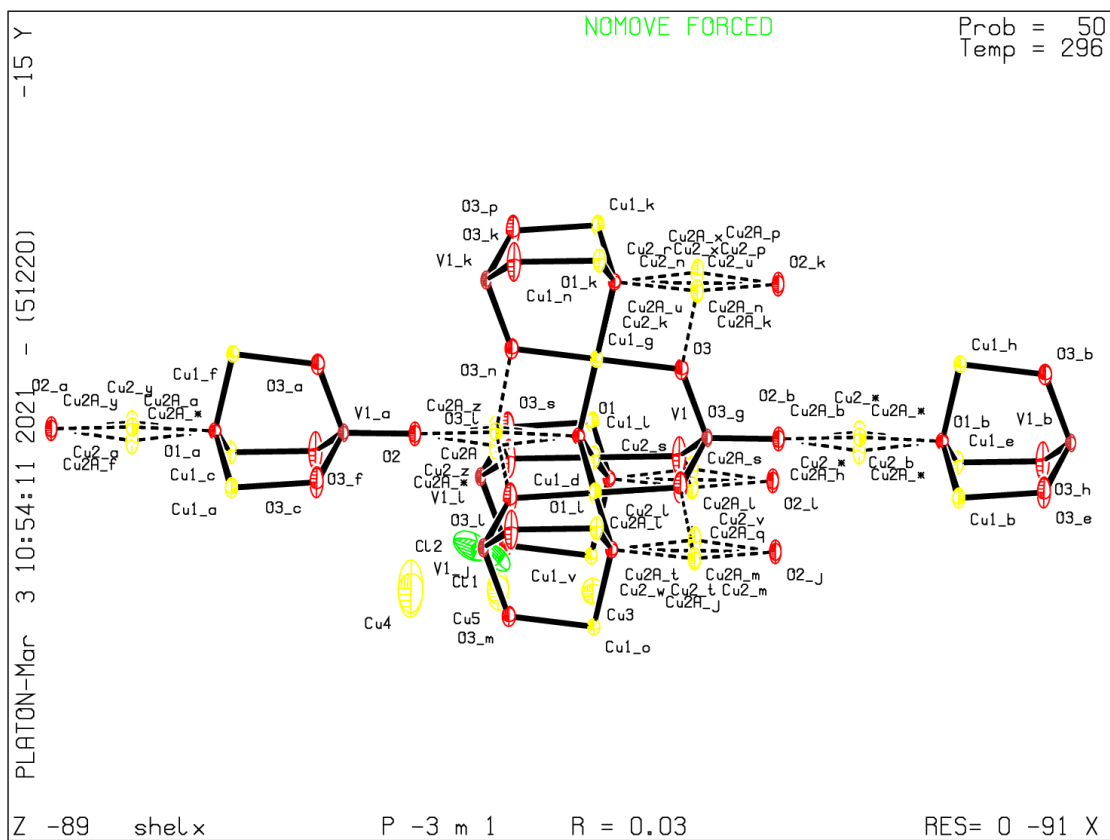

Supplement: s1 [file s1]
